# Supplementary material
Source: PubMed Central journal article supplement (PMC2494567)
Supplement: NIHMS56257-supplement-01.pdf [file NIHMS56257-supplement-01.pdf]

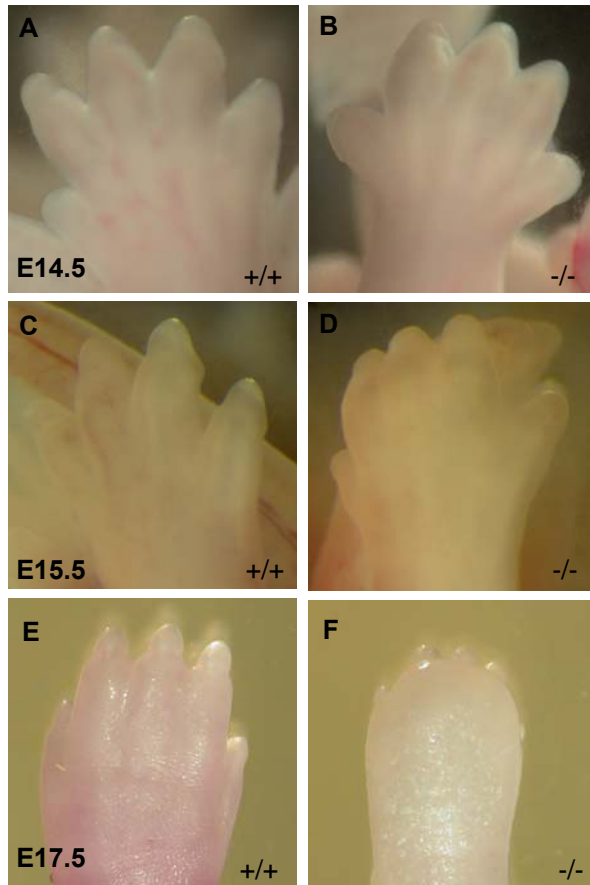

**Supplementary Fig. 1. External development of the hindlimb digits in WT (+/+) and *Get1* knockout (-/-) mice at the indicated embryonic stages.** In the WT embryos, the digits are fairly splayed out at e14.5, and by e17.5 the digits are fully fused and lying parallel to each other. Digit fusion appears normal in the *Get1* knockout embryos, but the distal limb appears swollen, especially at e17.5, perhaps due to the defective epidermal barrier.

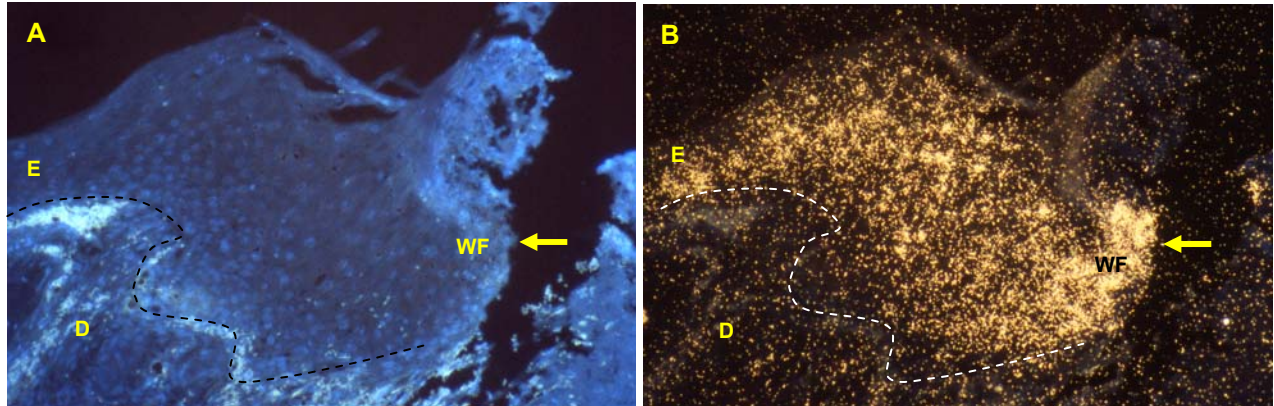

**Supplementary Fig. 2. Get1 expression in adult mouse skin wound healing.** (A) A bisbenzamide stained migrating wound front in a full thickness skin wound from an adult mouse. The arrow points to the wound front. The dashed line indicates the border between epidermis and dermis. (B) *In situ* hybridization of the wound front in panel B showing high Get1 expression in the wound front. D, dermis; E, epidermis; WF, wound front.

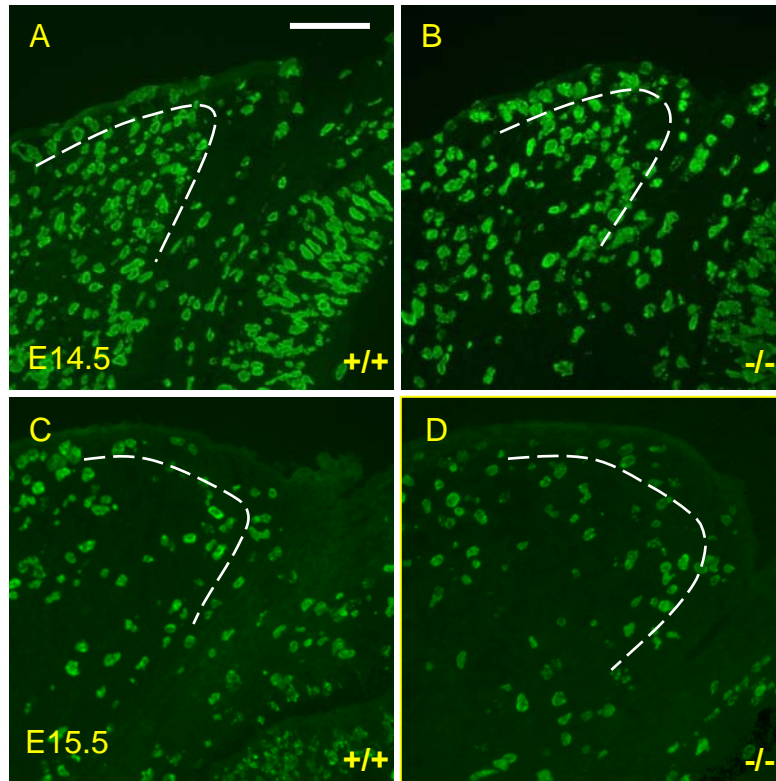

**Supplementary Fig. 3. Cell proliferation in developing eyelid.** BrdU staining of eyelids at the indicated time, comparing *Get1*<sup>-/-</sup> (B,D) to WT (A,C). The broken line shows the epidermal-dermal junction. Cell proliferation is not affected in *Get1*<sup>-/-</sup> eyelids. Scale bar: 50mm.

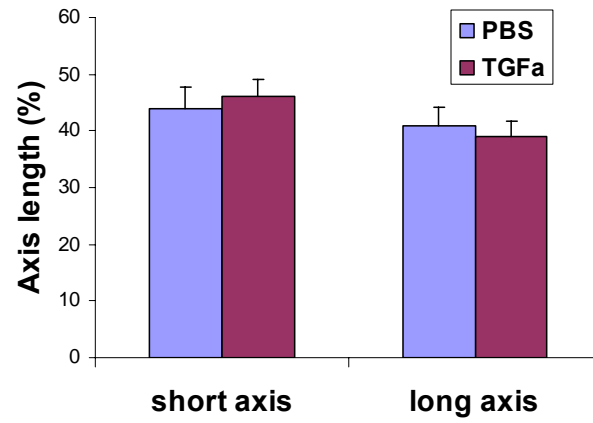

**Supplementary Fig. 4. Analysis of the effect of TGF $\alpha$  treatment on eyelid closure in WT eyes.** The bars represent means and SEM, based on 13 experiments.
